# Supplementary material
Source: publisher figshare collection journal article supplement (https://springernature.figshare.com/ndownloader/files/12783719)
Supplement: Supplementary file 1 [file 12783719]

Additional File. Table S1. Percent of coffee and basic grain farmers indicating the support they need from governments, agricultural centers and other organizations to adapt to climate change. The table includes only those needs expressed by >5% of all coffee farmers or >5% of all basic grain farmers.

| Type of support needed | Coffee farmers | | | | | |  | Basic grain farmers | | | | |
| --- | --- | --- | --- | --- | --- | --- | --- | --- | --- | --- | --- | --- |
|  | Turrialba  (n=5) | Los Santos (n=50) | Acatenango  (n=42) | Chiquimula  (n=18) | Yoro  (n=28) | Total  (n=188) |  | Acatenango (n=20) | Chiquimula  (n=50) | Choluteca  (n=50) | Yoro  (n=49) | Total  (n=169) |
| Provide technical support | 50.0 | 40.0 | 33.3 | 38.9 | 35.7 | 40.4 |  | 5.0 | 4.0 | 28.0 | 18.4 | 15.4 |
| Provide agrochemical inputs | 18.0 | 16.0 | 61.9 | 66.7 | 75.0 | 40.4 |  | 90.0 | 78.0 | 88.0 | 83.7 | 84.0 |
| Provide training | 26.0 | 12.0 | 11.9 | 22.2 | 21.4 | 18.1 |  | 5.0 | 14.0 | 8.0 | 8.2 | 9.5 |
| Improve coffee prices and marketing | 14.0 | 12.0 | 35.7 | 11.1 | 7.1 | 17.0 |  | 5.0 | 18.0 | 6.0 | 2.0 | 8.3 |
| Provide access to finance | 8.0 | 14.0 | 16.7 | 5.6 | 28.6 | 14.4 |  |  |  |  |  |  |
| Provide financial support or incentives | 18.0 | 16.0 | 4.8 | 11.1 | 3.6 | 11.7 |  | 10.0 | 24.0 | 42.0 | 42.9 | 33.1 |
| Provide improved varieties and/or seeds | 8.0 | 6.0 | 14.3 | 22.2 | 10.7 | 10.6 |  | 25.0 | 32.0 | 14.0 | 46.9 | 30.2 |
| Reduce price of agricultural inputs | 14.0 | 6.0 | 9.5 | 5.6 |  | 8.0 |  |  | 8.0 |  | 2.0 | 3.0 |
| Improve aid distribution | 10.0 | 18.0 |  |  |  | 7.4 |  |  |  |  |  |  |
| Provide farm tools and equipment (irrigation systems, tree nurseries, silos, etc.) | 2.0 |  |  | 11.1 | 32.1 | 6.4 |  |  | 12.0 | 10.0 | 22.4 | 13.0 |
